# Supplementary material for: A comprehensive analysis of RAS-effector interactions reveals interaction hotspots and new binding partners
Source: PubMed Central journal article supplement (PMC8163975; doi:10.1016/j.jbc.2021.100626), 2021-04-28
Supplement: mmc1.pdf [file mmc1.pdf]

## Supporting Information

### A comprehensive analysis of RAS-effector interactions reveals interaction hotspots and new binding partners

Soheila Rezaei Adariani, Neda S. Kazemineh, Farhad Bazgir, Christoph Wittich, Ehsan Amin, Claus A. M. Seidel, Radovan Dvorsky, Mohammad Reza Ahmadian  
Institute of Biochemistry and Molecular Biology II, Heinrich Heine University, Medical Faculty, 40225 Düsseldorf, Germany

**Table S1.** Human proteins containing RAS association (RA) domain

| No. | Entry  | Protein name                  |
|-----|--------|-------------------------------|
| 1   | Q9NS23 | RASSF1, NORE2, PDA32          |
| 2   | P50749 | RASSF2, CENP34, RASFADIN      |
| 3   | Q86WH2 | RASSF3                        |
| 4   | Q9H2L5 | RASSF4                        |
| 5   | Q8WWW0 | RASSF5, RAPL, NORE1           |
| 6   | Q6ZTQ3 | RASSF6                        |
| 7   | Q02833 | RASSF7, HRC1                  |
| 8   | Q8NHQ8 | RASSF8, HOJ1                  |
| 9   | O75901 | RASSF9, PCIP1, PAMCI          |
| 10  | A6NK89 | RASSF10                       |
| 11  | P55196 | AF6, AFDN, MLLT4              |
| 12  | Q12967 | RALGDS, RALGEF, RGF, RGDS     |
| 13  | O15211 | RALGDSL2, RAB2L               |
| 14  | Q9NZL6 | RGL1                          |
| 15  | Q9BSI0 | RGL2                          |
| 16  | Q3MIN7 | RGL3                          |
| 17  | Q9Y4G8 | PDZGEF1, RAPGEF2, RAGEF1      |
| 18  | Q8TEU7 | PDZGEF2, RAPGEF6, RAGEF2      |
| 19  | Q9P212 | PLC $\epsilon$ 1, PPLC, NPHS3 |
| 20  | Q13671 | RIN1, JC99                    |
| 21  | Q8WYP3 | RIN2, JC265                   |
| 22  | Q8TB24 | RIN3                          |
| 23  | Q5U651 | RAIN, RASIP1                  |
| 24  | Q7Z5R6 | RIAM, APBB1IP, PREL1, RARP1   |
| 25  | Q96JH8 | RADIL, RASIP2                 |
| 26  | Q14451 | GRB7, B47                     |
| 27  | Q13322 | GRB10, GRB-IR, Meg1, RSS      |
| 28  | Q14449 | GRB14                         |
| 29  | Q15036 | SNX17                         |
| 30  | Q96L92 | SNX27                         |
| 31  | Q70E73 | RAPH1, PREL2                  |
| 32  | P52824 | DGKQ                          |
| 33  | Q96P48 | ARAP1                         |
| 34  | Q8WZ64 | ARAP2                         |
| 35  | Q8WWN8 | ARAP3                         |
| 36  | B2RTY4 | MYO9A                         |
| 37  | Q13459 | MYO9B                         |
| 38  | Q9HD67 | MYO10                         |
| 39  | Q9P2F6 | ARHGAP20                      |

**Table S2.** Human proteins containing RAS binding (RB) domain

| No. | Entry  | Protein name                                 |
|-----|--------|----------------------------------------------|
| 1   | P10398 | ARAF, RAFA1, PKS                             |
| 2   | P15056 | BRAF, NS7, p94                               |
| 3   | P04049 | CRAF, CMD1NN, NS5                            |
| 4   | P42336 | PI3K $\alpha$ , p110 $\alpha$ , CLAPO, CLOVE |
| 5   | P42338 | PI3K $\beta$ , p110 $\beta$                  |
| 6   | P48736 | PI3K $\gamma$ , $\beta$ 110 $\gamma$ , PIK3  |
| 7   | O00329 | PI3K $\delta$ , p110 $\delta$                |
| 8   | O00443 | PI3KC2A, PI3KC2 $\alpha$                     |
| 9   | O00750 | PI3KC2B, PI3KC2 $\beta$                      |
| 10  | O75747 | PI3KC2G, PI3KC2 $\gamma$                     |
| 11  | O14924 | RGS12                                        |
| 12  | O43566 | RGS14                                        |
| 13  | Q13009 | TIAM1                                        |
| 14  | Q8IVF5 | TIAM2, STEF                                  |

**Table S3.** Proposed RAS effectors with no RA/RB domains

| No. | Entry  | Protein name   | Reference |
|-----|--------|----------------|-----------|
| 1   | Q8IZJ4 | RGL4           | [1]       |
| 2   | O95398 | RAPGEF3, Epac1 | [1, 2]    |
| 3   | Q8WZA2 | RAPGEF4, Epac2 | [1, 3]    |
| 4   | Q92565 | RAPGEF5, Repac | [1]       |
| 5   | O00522 | KRIT1, Krit    | [1, 4]    |
| 6   | P19367 | HK1            | [5]       |
| 7   | Q9BPZ7 | SIN1, MAPKAP1  | [6]       |
| 8   | Q9BYB0 | SHANK3         | [7, 8]    |
| 9   | Q9UPX8 | SHANK2         | [8]       |
| 10  | Q8N9S9 | SNX31          | [9]       |
| 11  | Q75LH2 | FLJ10324       | [10]      |

- [1] Ibáñez Gaspar V, Catozzi S, Ternet C, Luthert PJ, Kiel C. Analysis of Ras-effector interaction competition in large intestine and colorectal cancer context. *Small GTPases*. 2020;1-17.
- [2] Kiel C, Wohlgemuth S, Rousseau F, Schymkowitz J, Ferkinghoff-Borg J, Wittinghofer F, et al. Recognizing and defining true Ras binding domains II: in silico prediction based on homology modelling and energy calculations. *Journal of molecular biology*. 2005;348:759-75.
- [3] Kiel C, Foglierini M, Kuemmerer N, Beltrao P, Serrano L. A genome-wide Ras-effector interaction network. *Journal of molecular biology*. 2007;370:1020-32.
- [4] Wohlgemuth S, Kiel C, Krämer A, Serrano L, Wittinghofer F, Herrmann C. Recognizing and defining true Ras binding domains I: biochemical analysis. *Journal of molecular biology*. 2005;348:741-58.
- [5] Amendola CR, Mahaffey JP, Parker SJ, Ahearn IM, Chen W-C, Zhou M, et al. KRAS4A directly regulates hexokinase 1. *Nature*. 2019;576:482-6.
- [6] Schroder WA, Buck M, Cloonan N, Hancock JF, Suhrbier A, Sculley T, et al. Human Sin1 contains Ras-binding and pleckstrin homology domains and suppresses Ras signalling. *Cellular signalling*. 2007;19:1279-89.
- [7] Chowdhury D, Hell JW. How CBP/Shank3 Guards Rap and H-Ras. *Structure*. 2020;28:274-6.
- [8] Cai Q, Hosokawa T, Zeng M, Hayashi Y, Zhang M. Shank3 Binds to and Stabilizes the Active Form of Rap1 and HRas GTPases via Its NTD-ANK Tandem with Distinct Mechanisms. *Structure*. 2019.
- [9] Ghai R, Bugarcic A, Liu H, Norwood SJ, Skeldal S, Coulson EJ, et al. Structural basis for endosomal trafficking of diverse transmembrane cargos by PX-FERM proteins. *Proceedings of the National Academy of Sciences*. 2013;110:E643-E52.
- [10] The crystal structure of the RA domain of FLJ10324 (RADIL): <http://www.rcsb.org/structure/3EC8>.

**Table S4.** Human proteins containing RAS-related GTP-binding domain

| No. | Entry    | Protein name              |
|-----|----------|---------------------------|
| 1   | P01112-1 | HRAS1, p21HRAS            |
| 2   | P01112-2 | HRAS2, p19HRAS            |
| 3   | P01111   | NRAS                      |
| 4   | P01116-1 | KRAS4A                    |
| 5   | P01116-2 | KRAS4B, RASK2             |
| 6   | Q7Z444   | ERAS, KRAS2, HRASP        |
| 7   | P11233   | RALA                      |
| 8   | P11234   | RALB                      |
| 9   | P10301   | RRAS, RRAS1               |
| 10  | P62070   | RRAS2 TC21                |
| 11  | O14807   | RRAS3, MRAS               |
| 12  | Q92963   | RIT1, RIT, RIBB, ROC1     |
| 13  | Q99578   | RIT2, RIN, ROC2           |
| 14  | P62834   | RAP1A, KREV1              |
| 15  | P61224   | RAP1B                     |
| 16  | P61225   | RAP2B                     |
| 17  | P10114   | RAP2A                     |
| 18  | Q9Y3L5   | RAP2C                     |
| 19  | Q15382   | RHEB1                     |
| 20  | Q8TAI7   | RHEB2                     |
| 21  | Q9Y272   | RASD1, AGS1, DEXRAS1      |
| 22  | Q96D21   | RASD2, RHES, TEM2         |
| 23  | O95057   | DIRAS1, RIG, GBTS1        |
| 24  | Q96HU8   | DIRAS2                    |
| 25  | O95661   | DIRAS3, ARHI, NOEY2, RHOI |

**Table S5.** Dissociation constants determined for the RAS-effector interactions.

|         | HRAS    | RRAS1  | RAP1B  | RAP2A   | RALA   | RHEB   | RIT1   |
|---------|---------|--------|--------|---------|--------|--------|--------|
| RASSF1  | 52±10   | 33±4   | 26±2   | 22±2    | 18±3   | 37±3   | 136±26 |
| RASSF2  | 147±26  | 122±14 | 67±9   | 47±5    | 167±20 | 44±7   | n.b.   |
| RASSF3  | 500±164 | 435±61 | 116±26 | 100±18  | 139±15 | 64±9   | n.b.   |
| RASSF4  | 193±31  | n.b.   | 101±21 | 88±10   | 191±46 | 47±7   | 58±9   |
| RASSF5  | 1.0±0.1 | 56±4   | 4.0±1  | 2.0±0.2 | 49±10  | 46±7   | n.b.   |
| RASSF6  | 91±13   | 112±20 | 65±18  | 53±19   | n.b.   | 56±13  | 98±27  |
| RASSF7  | 140±67  | 30±5   | 72±13  | 68±9    | 101±30 | 76±16  | 34±3   |
| RASSF8  | n.b.    | 114±13 | 66±15  | 67±21   | 115±9  | 102±21 | 76±7   |
| RASSF9  | 179±61  | n.b.   | 74±18  | 66±15   | n.b.   | 143±38 | 27±4   |
| RASSF10 | n.b.    | 99±10  | 73±6   | 67±16   | n.b.   | 150±44 | 55±11  |
| CRAF    | 0.3±0.1 | 3.3±1  | 30±7   | n.b.    | n.b.   | 35±9   | 139±40 |

Dissociation constants ( $K_d$  values  $\pm$  SE calculated by matrix inversion using GraFit program) were determined by evaluating the fluorescence polarization data (Figures S5 and S6) shown in Figure 3 as bar charts. No binding (n.b.) stands for  $K_d$  values higher than 500  $\mu$ M.

**Table S6. Published structures of the RAS and Effector protein complexes.**

| Structures                                       | PDB code | Res. (Å) | Ref. <sup>a</sup> |
|--------------------------------------------------|----------|----------|-------------------|
| <b>RB domains</b>                                |          |          |                   |
| RAP1A-GTP-CRAF RB                                | 1C1Y     | 2.2      | [1]               |
| RAP1A(E30D/K31E)-GppNHp-CRAF RB                  | 1GUA     | 2.0      | [2]               |
| RAP1A(E30D/K31E)-GDP-CRAF RB(A85K/N71R)          | 3KUC     | 1.92     | [3]               |
| HRAS-GDP-CRAF-RB(A85K)                           | 3KUD     | 2.15     | [3]               |
| HRAS-GppNHp-CRAF-RB                              | 4G0N     | 2.45     | [4]               |
| HRAS(Q61L)-GppNHp-CRAF-RB                        | 4G3X     | 3.25     | [4]               |
| KRAS-GppNHp-ARAF-RB                              | 2MSE     | NMR      | [5]               |
| HRAS(G12V)-GppNHp-PI3K $\gamma$ -RB(V223K/V326A) | 1HE8     | 3.0      | [6]               |
| HRAS-GppNHp-Byr2-RB                              | 1K8R     | 3.0      | [7]               |
| <b>RA domains</b>                                |          |          |                   |
| HRAS(D30E/E31K)-GppNHp-RASSF5-RA (L285M/K302D)   | 3DDC     | 1.8      | [8]               |
| HRAS(G12V)-GTP-GRAB14-RA/PH (K272A/E273A)        | 4K81     | 2.4      | [9]               |
| HRAS-GppNHp-RALGDS                               | 1LFD     | 2.1      | [10]              |
| HRAS(G12V)-GTP-PLC $\epsilon$ (Y2176L) RA2       | 2C5L     | 1.9      | [11]              |
| HRAS-GppNHp-Afadin RA1                           | 6AMB     | 2.5      | [12]              |
| RAP1B-GppNHp-Rasip1 RA                           | 5KHO     | 2.78     | [13]              |

<sup>a</sup> References are listed below.

## References

- [1] Nassar N, Horn G, Herrmann CA, Scherer A, McCormick F, Wittinghofer A. The 2.2 Å crystal structure of the Ras-binding domain of the serine/threonine kinase c-Raf1 in complex with Rap1A and a GTP analogue. *Nature*. 1995;375:554.
- [2] Nassar N, Horn G, Herrmann C, Block C, Janknecht R, Wittinghofer A. Ras/Rap effector specificity determined by charge reversal. *Nat Struct Biol*. 1996;3:723-9.
- [3] Filchtinski D, Sharabi O, Ruppel A, Vetter IR, Herrmann C, Shifman JM. What Makes Ras an Efficient Molecular Switch: A Computational, Biophysical, and Structural Study of Ras-GDP Interactions with Mutants of Raf. *Journal of Molecular Biology*. 2010;399:422-35.
- [4] Fetis Susan K, Guterres H, Kearney Bradley M, Buhman G, Ma B, Nussinov R, et al. Allosteric Effects of the Oncogenic RasQ61L Mutant on Raf-RBD. *Structure*. 2015;23:505-16.
- [5] Mazhab-Jafari MT, Marshall CB, Smith MJ, Gasmir-Seabrook GMC, Stathopoulos PB, Inagaki F, et al. Oncogenic and RASopathy-associated K-RAS mutations relieve membrane-dependent occlusion of the effector-binding site. *Proceedings of the National Academy of Sciences*. 2015;112:6625-30.
- [6] Pacold ME, Suire S, Perisic O, Lara-Gonzalez S, Davis CT, Walker EH, et al. Crystal structure and functional analysis of Ras binding to its effector phosphoinositide 3-kinase gamma. *Cell*. 2000;103:931-43.
- [7] Scheffzek K, Grunewald P, Wohlgemuth S, Kabsch W, Tu H, Wigler M, et al. The Ras-Byr2RBD complex: structural basis for Ras effector recognition in yeast. *Structure*. 2001;9:1043-50.
- [8] Stieglitz B, Bee C, Schwarz D, Yildiz Ö, Moshnikova A, Khokhlatchev A, et al. Novel type of Ras effector interaction established between tumour suppressor NORE1A and Ras switch II. *The EMBO journal*. 2008;27:1995-2005.
- [9] Qamra R, Hubbard SR. Structural Basis for the Interaction of the Adaptor Protein Grb14 with Activated Ras. *PLoS One*. 2013;8:e72473.
- [10] Huang L, Hofer F, Martin GS, Kim SH. Structural basis for the interaction of Ras with RalGDS. *Nat Struct Biol*. 1998;5:422-6.
- [11] Bunney TD, Harris R, Gandarillas NL, Josephs MB, Roe SM, Sorli SC, et al. Structural and Mechanistic Insights into Ras Association Domains of Phospholipase C Epsilon. *Molecular Cell*. 2006;21:495-507.
- [12] Smith MJ, Ottoni E, Ishiyama N, Goudreaux M, Haman A, Meyer C, et al. Evolution of AF6-RAS association and its implications in mixed-lineage leukemia. *Nature communications*. 2017;8:1099.
- [13] Gingras AR, Puzon-McLaughlin W, Bobkov AA, Ginsberg MH. Structural basis of dimeric Rasip1 RA domain recognition of the Ras subfamily of GTP-binding proteins. *Structure*. 2016;24:2152-62.

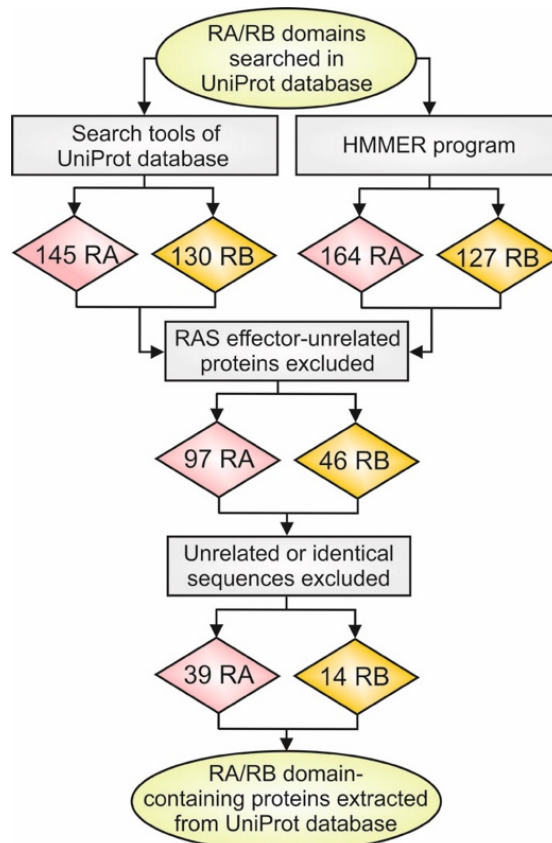

**Figure S1. Flowchart of an *in-silico* search for RA/RB domains in data bases.** RAS effector proteins in the human proteome were selected in a stepwise search. The initial search for input sequences, containing RA/RB domains, was performed in the UniProt database for proteins containing annotated RA/RB domains. Then HMMER was used to identify more sequence related domains. In the next step, the ClustalW sequence alignments of the output sequences were manually inspected and carefully processed to obtain all output sequences, such as 41 RA (in 39 different proteins) and 16 RB (in 14 different proteins) domains (Fig. S2 and S3), depicted in Tables S1 and S2.





**Figure S2. Multiple sequence alignment of human RA domains.** Amino acid sequences of 41 RA domains of 39 RA domain-containing proteins were aligned by using ClustalW and implemented in BioEdit with default multiple alignment parameters. Asterisks highlight RAS-binding amino acids of the respective effectors as indicated in red, green, magenta, blue, orange, and purple. Underlined proteins were biochemically investigated in this study.

| Protein   | Sequence         |
|-----------|------------------|
| PI3Kg     | NTIRVFL* * * * * |
| CRAF      | PKQRTV* * * * *  |
| BRAF      | PKQRTV* * * * *  |
| ARAF      | PKQRTV* * * * *  |
| RGS12-RB1 | PKQRTV* * * * *  |
| RGS14-RB1 | PKQRTV* * * * *  |
| RGS14-RB2 | PKQRTV* * * * *  |
| TIAM1     | PKQRTV* * * * *  |
| TIAM2     | PKQRTV* * * * *  |
| PI3Kγ     | PKQRTV* * * * *  |
| PI3Kδ     | PKQRTV* * * * *  |
| PI3Kβ     | PKQRTV* * * * *  |
| PI3Kθ     | PKQRTV* * * * *  |
| PI3Kξ     | PKQRTV* * * * *  |
| PI3Kζ     | PKQRTV* * * * *  |
| PI3K2A    | PKQRTV* * * * *  |
| PI3K2B    | PKQRTV* * * * *  |

SIAS: Sequences identity of 10.5 % and similarity of 25.5 % for the RB domain of 14 proteins

**Figure S3. Multiple sequence alignment of human RB domains.** Amino acid sequences of 16 RB domains of 14 RB domain-containing proteins were aligned by using ClustalW and implemented in BioEdit with default multiple alignment parameters. Asterisks highlight RAS-binding amino acids of the respective effectors as indicated in green and red. Underlined proteins were biochemically investigated in this study.

|        | G domain |                                    |                               |      |     | Membrane anchorage         |      | Residue |
|--------|----------|------------------------------------|-------------------------------|------|-----|----------------------------|------|---------|
|        | G1       | Sw I/G2                            | Sw II/G3                      | G4   | G5  | HVR                        | CAAX |         |
| HRAS1  | GAGGVGKS | * ** * * * * * * * * * * * * * * * | LDI LD TAGQE E Y SAMRDQYMRT   | NKCD | SAK | QHLRKLNPDESPPGCMSCK        | CVLS | 189     |
| HRAS2  | GAGGVGKS | * ** * * * * * * * * * * * * * * * | LLDI LD TAGQE E Y SAMRDQYMRT  | NKCD | SAK | SRSGSSSSGTLWDRPMP          | —    | 170     |
| NRAS   | GAGGVGKS | * ** * * * * * * * * * * * * * * * | LLDI LD TAGQE E Y SAMRDQYMRT  | NKCD | SAK | QYRMKKLNSDDGTQGMGLP        | CVVM | 189     |
| KRAS4A | GAGGVGKS | * ** * * * * * * * * * * * * * * * | LLDI LD TAGQE E Y SAMRDQYMRT  | NKCD | SAK | QYRLKKI SKEEKTGCVYIKK      | CIIM | 189     |
| KRAS4B | GAGGVGKS | * ** * * * * * * * * * * * * * * * | LLDI LD TAGQE E Y SAMRDQYMRT  | NKCD | SAK | KHKEKMSKDGKKKKKSKTK        | CIIM | 188     |
| ERAS   | GAGGVGKS | * ** * * * * * * * * * * * * * * * | LLDI LD TAGQE E Y SAMRDQYMRT  | NKCD | SAK | EPMARSCREKTRHQKATCHCG      | CVA  | 233     |
| RALA   | GAGGVGKS | * ** * * * * * * * * * * * * * * * | LLNV LD TAGQA I HRA LRQCLAV   | NKCD | SAK | DSKEKNGKKRKS LAKRIRER      | CCIL | 206     |
| RALB   | GAGGVGKS | * ** * * * * * * * * * * * * * * * | QIDI LD TAGQE D YAA IRDNYFRS  | NKSD | SAK | SENKDKNGKSSKNKKSFKER       | CCLL | 206     |
| RRAS3  | GAGGVGKS | * ** * * * * * * * * * * * * * * * | QIDI LD TAGQE D YAA IRDNYFRS  | NKSD | SAK | QKKKKTKWRGDRATGTHKLQ       | CVIL | 208     |
| RRAS1  | GAGGVGKS | * ** * * * * * * * * * * * * * * * | LLDV DDTAGQE E FSAMREQYMRRA   | NKVD | SAK | GEDELPPSPAPRKKGGGCP        | CVLL | 218     |
| RRAS2  | GAGGVGKS | * ** * * * * * * * * * * * * * * * | RLDI LD TAGQE E FGAMREQYMRRA  | NKAD | SAK | EQECPSPSEPTRKEKKGKGC       | CVIF | 204     |
| RIT1   | GAGGVGKS | * ** * * * * * * * * * * * * * * * | RLDI LD TAGQE E FTAMREQYMRRA  | NKSD | SAK | KKSKPKNSVWKRLLKSPFRKKKDSVT | —    | 219     |
| RIT2   | GAGGVGKS | * ** * * * * * * * * * * * * * * * | YLDI LD TAGQA E FTAMREQYMRG   | NKID | SAK | KKLKRKDSLWKKLKGSLKKKRNMT   | —    | 217     |
| RAP1A  | GAGGVGKS | * ** * * * * * * * * * * * * * * * | MLEI LD TAGT E QFTAMRDLYMKN   | NKCD | SAK | PVEKKPKPKKS                | CLLL | 184     |
| RAP1B  | GAGGVGKS | * ** * * * * * * * * * * * * * * * | MLEI LD TAGT E QFTAMRDLYMKN   | NKCD | SAK | PVPGKARKKSS                | CQLL | 184     |
| RAP2B  | GAGGVGKS | * ** * * * * * * * * * * * * * * * | VLEI LD TAGT E QFASMRDLYIKN   | NKVD | SAK | QPKDDDFCCSA                | CNIQ | 183     |
| RAP2A  | GAGGVGKS | * ** * * * * * * * * * * * * * * * | VLEI LD TAGT E QFASMRDLYIKN   | NKVD | SAK | QPNDEGGCCSA                | CVIL | 183     |
| RAP2C  | GAGGVGKS | * ** * * * * * * * * * * * * * * * | VLEI LD TAGT E QFASMRDLYIKN   | NKVD | SAK | LPEKQDQCCTT                | CVVQ | 183     |
| RHEB1  | GYSRVGKS | * ** * * * * * * * * * * * * * * * | HLQL VDTAGD E YS I PFTYS I IG | NKVD | SAK | GAASQGGKSS                 | CVM  | 184     |
| RHEB2  | GYSRVGKS | * ** * * * * * * * * * * * * * * * | HLHL VDTAGD E YS I LP YS I IG | NKAD | SAK | NSYQGERR                   | CHLM | 181     |
| RASD1  | GSSKVGKT | * ** * * * * * * * * * * * * * * * | QLDI LD TSGNH PFPAMRRLS I LT  | NKGD | SAK | SDLMY I REKASAGSQAQDKER    | CVIS | 281     |
| RASD2  | GASRVGKS | * ** * * * * * * * * * * * * * * * | QLDI LD TSGNH PFPAMRRLS I LT  | NKGD | SAK | SDKMY I KAKVLRREGQAREDK    | CTIQ | 266     |
| DIRAS3 | GTAGVGKS | * ** * * * * * * * * * * * * * * * | SLHI TDSKSGDGNRALQRHVIAR      | NKSD | SAK | GLOEPEKKSQMPNTEKLLDK       | CIIM | 229     |
| DIRAS1 | GAGGVGKS | * ** * * * * * * * * * * * * * * * | TLQI TDTTGGSHQFPAMQRLS I SK   | NKCD | SAK | SLNIDGKRSGKQKRTDRYKGG      | CTLM | 198     |
| DIRAS2 | GAGGVGKS | * ** * * * * * * * * * * * * * * * | TLQL TDTTGGSHQFPAMQRLS I SK   | NKCD | SAK | SLQIDGKKSQKQKREKLLKGG      | CVIM | 199     |

SIAS: Sequences identity of 48.6 % and similarity of 61.5 % for the G domain of 25 RAS proteins

**Figure S4. Multiple sequence alignment of human RAS protein family.** Amino acid sequences of 25 RAS family proteins were aligned using ClustalW implemented in BioEdit with default multiple alignment parameters. Asterisks highlight effector-binding amino acids as indicated in red. Conserved signatures of the RAS proteins critical for GDP/GTP binding, GTP hydrolysis and proteins interactions are represented as G1 (or P loop for phosphate binding and magnesium ion coordination), G2 (or switch I for magnesium ion coordination and  $\gamma$ -phosphate binding), G3 (or switch II for  $\gamma$ -phosphate binding containing the catalytic glutamine), G4 (the major determinant of guanine base binding specificity) and G5 box (for guanine base binding). HVR (hypervariable region) and CAAX (C is cysteine, A is any aliphatic amino acid, and X is any amino acid) are critical motifs for association with the cell membrane. Underlined proteins were biochemically investigated in this study.

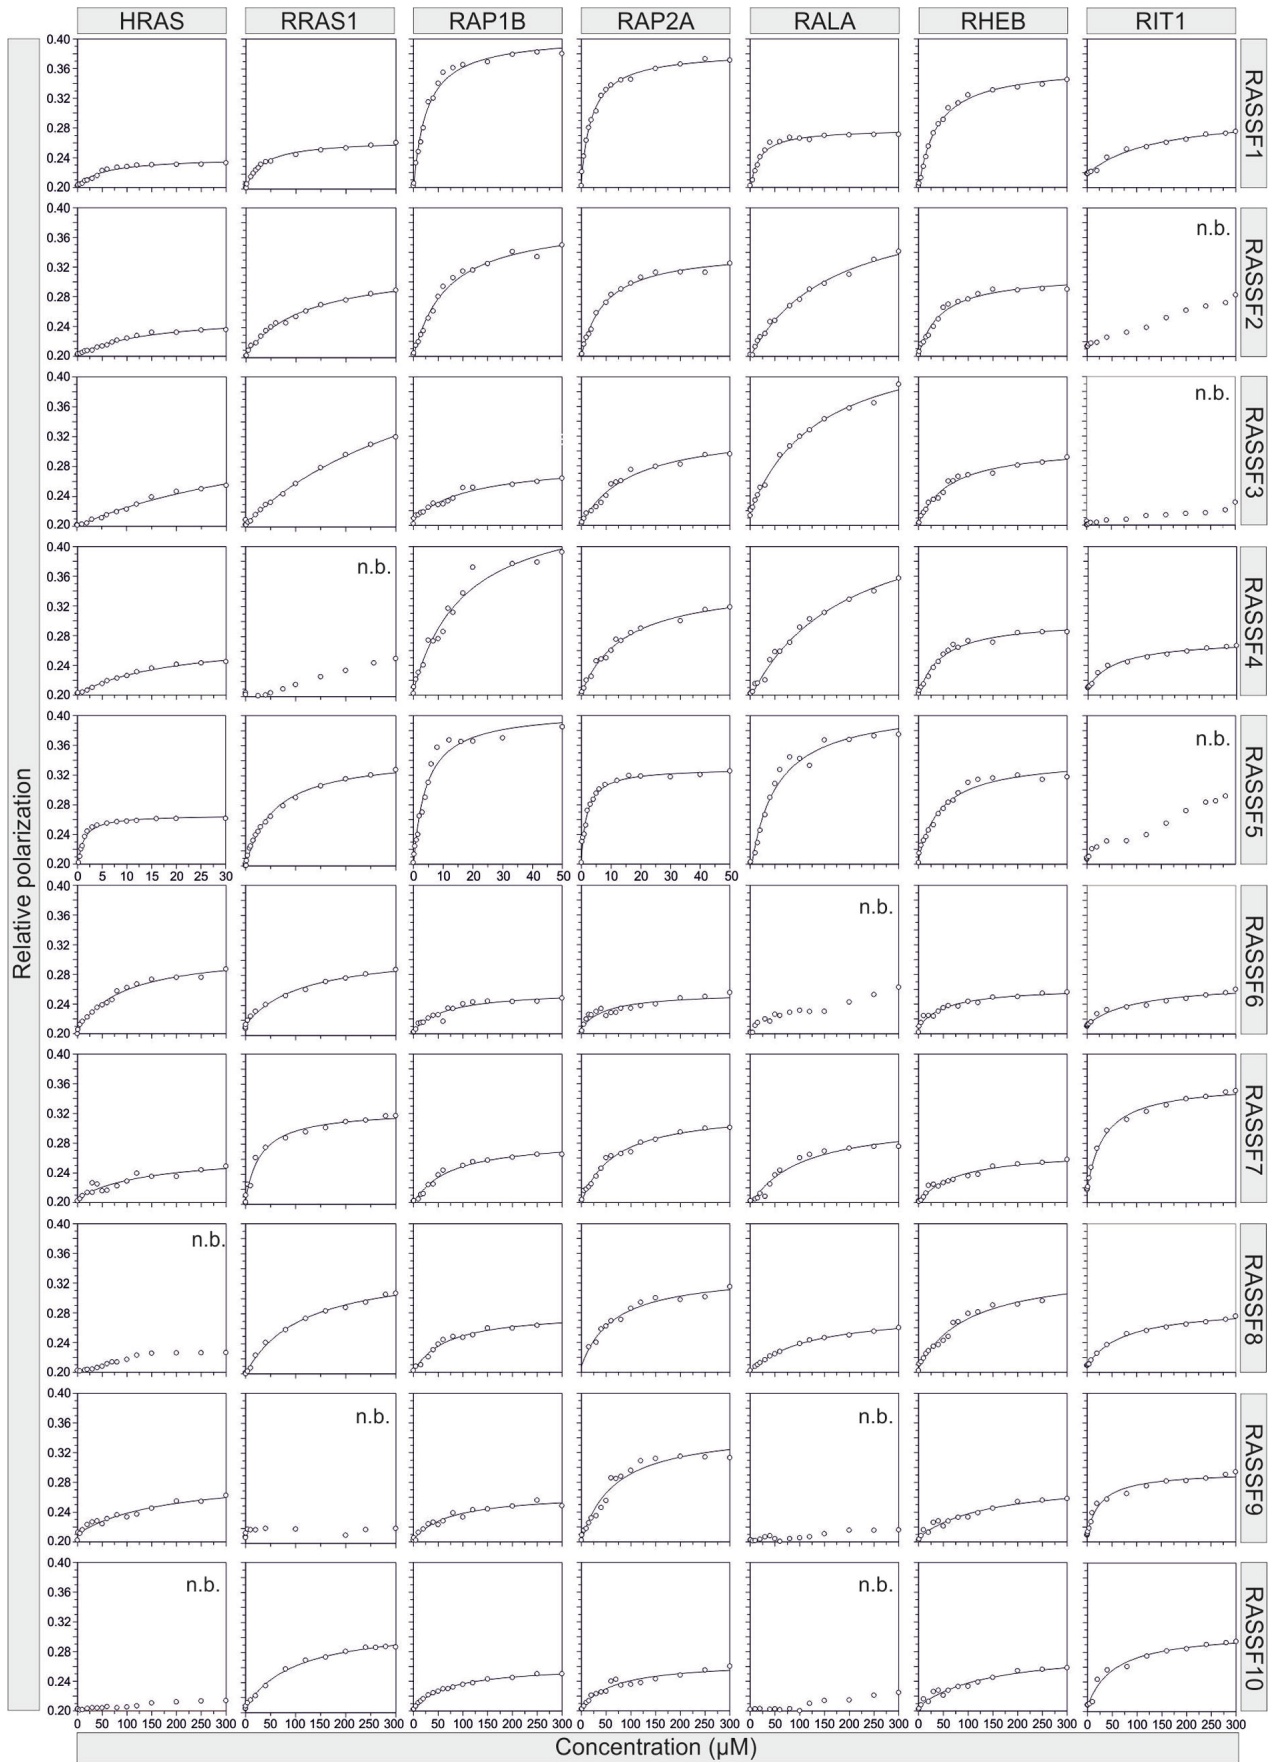

**Figure S5. Fluorescence polarization measurements of RAS interactions with RASSF RA domains.** Fluorescence polarization experiments were conducted to determine the dissociation constants ( $K_d$ ) by titrating the active, mGppNHp-bound form of RAS proteins (1  $\mu$ M) with increasing concentrations of the respective effector domains. The X-axis represents the concentration of the effector domain as MBP fusion proteins in  $\mu$ M and Y-axis represents fluorescence polarization. The lines through the data points indicate that equilibrium  $K_d$  values have been determined for the respective measurements. The  $K_d$  values are summarized in [Figure 3](#) and [Table S5](#).

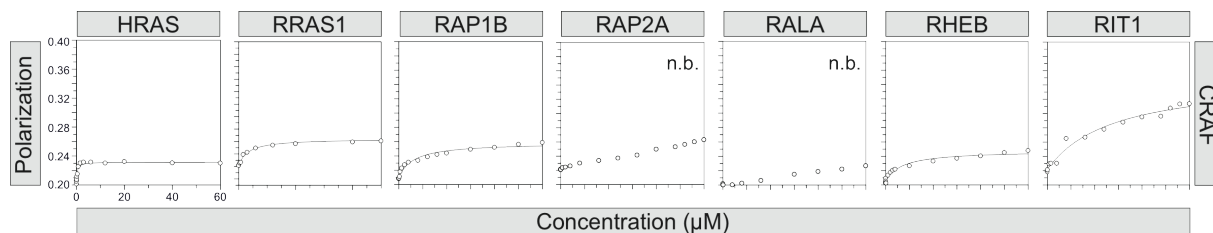

**Figure S6. Fluorescence polarization measurements of RAS interactions with CRAF RB domain.** Fluorescence polarization experiments were conducted to determine the dissociation constants ( $K_d$ ) by titrating the active, mGppNHp-bound form of RAS proteins (1  $\mu$ M) with increasing concentrations of CRAF RB domain. The X-axis represents the concentration of the effector domain as MBP fusion proteins in  $\mu$ M and Y-axis represents fluorescence polarization. The lines through the data points indicate that equilibrium  $K_d$  values have been determined for the respective measurements. The  $K_d$  values are summarized in [Figure 3](#) and [Table S5](#).

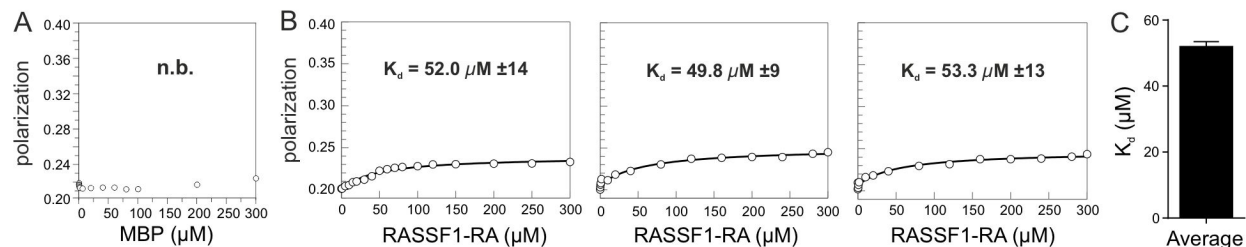

**Figure S7. Control fluorescence polarization measurements.** (A) Titration of mGppNhp-bound HRAS with purified MBP as a control experiment showed that MBP itself does not bind HRAS. (B) Three independent measurement for the interaction between HRAS•mGppNhp with RASSF1-RA resulted in very similar changes in fluorescence polarization. (C) The  $K_d$  values, determined for the three measurements in C, revealed a standard error of 1.021, which is far below the estimated standard error for the initial measurement in the manuscript ( $\pm 10$ ). SE was calculated using GraphPad Prism software. This Result allow the assumption that the standard error for each individual measurement in this study is the maximum probable error predicted for that measurement, which would be a lower number in triplicate measurements.

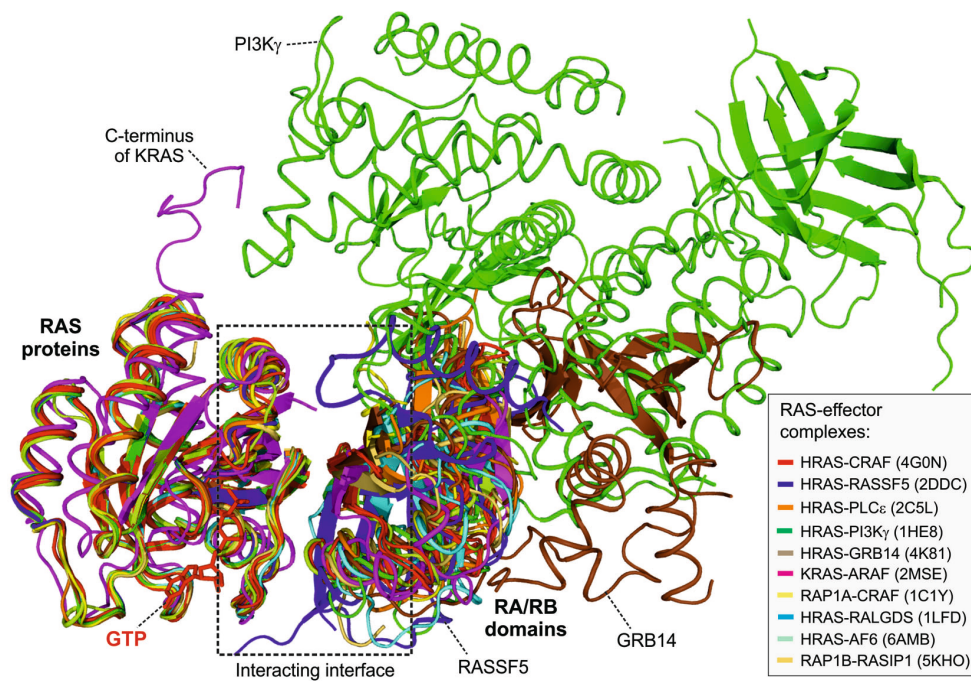

**Figure S8. Superposition of all available RAS–effector complex structures.** Ten structures of RAS-RA/RB domain complexes (see the inset and more details [Table S6](#)) were overlaid in ribbon representation. The interface residues (boxed), which were used for the generation of the matrix in [Figure 3](#), are highlighted in [Figure S9](#). Additional properties outside the interaction interface (box) are indicated.



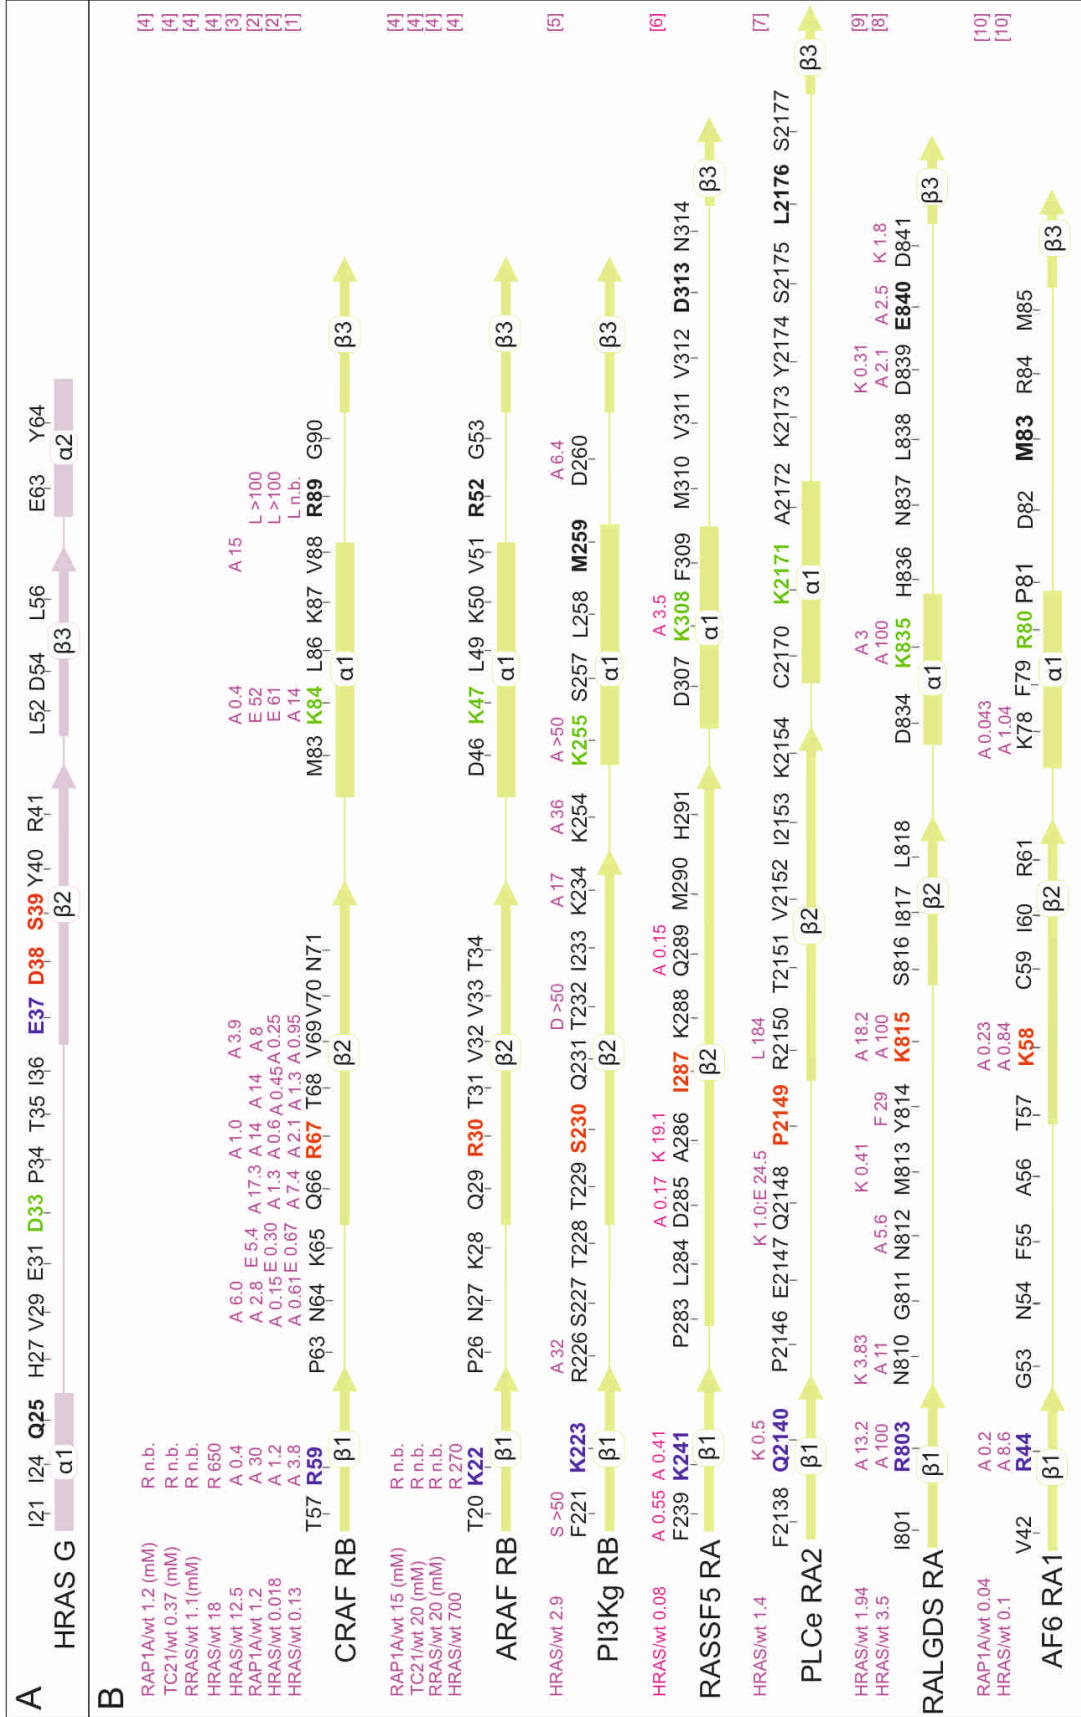

**Figure S9. Secondary structures, the corresponding interacting residues, and published dissociation constants ( $K_d$ ) for respective interactions are illustrated for HRAS G domain (A) and various RA/RB domains (B).** The secondary structures and the corresponding interacting residues (above the secondary structures) were extracted from the structures deposited in the PDB (Table 6). Color codes of the interacting residues (blue, red, green, black; bold) correspond to those in Figures 3 and S2-S4. Determined  $K_d$  values for the interaction of defined RA/RB domains with different RAS family proteins and the variants of the interacting residues are represented above the interacting residues, respectively. The numbers on the right side refer to the original studies (see references below).

## References

- [1] Block C, Janknecht R, Herrmann C, Nassar N, Wittinghofer A. Quantitative structure-activity analysis correlating Ras/Raf interaction in vitro to Raf activation in vivo. *Nature structural biology*. 1996;3:244-51.
- [2] Nassar N, Horn G, Herrmann C, Block C, Janknecht R, Wittinghofer A. Ras/Rap effector specificity determined by charge reversal. *Nature structural biology*. 1996;3:723.
- [3] Rudolph MG, Linnemann T, Grünewald P, Wittinghofer A, Vetter IR, Herrmann C. Thermodynamics of Ras/effector and Cdc42/effector interactions probed by isothermal titration calorimetry. *Journal of Biological Chemistry*. 2001;276:23914-21.
- [4] Weber CK, Slupsky JR, Herrmann C, Schuler M, Rapp UR, Block C. Mitogenic signaling of Ras is regulated by differential interaction with Raf isozymes. *Oncogene*. 2000;19:169-76.
- [5] Pacold ME, Suire S, Perisic O, Lara-Gonzalez S, Davis CT, Walker EH, et al. Crystal structure and functional analysis of Ras binding to its effector phosphoinositide 3-kinase  $\gamma$ . *Cell*. 2000;103:931-44.
- [6] Stieglitz B, Bee C, Schwarz D, Yildiz Ö, Moshnikova A, Khokhlatchev A, et al. Novel type of Ras effector interaction established between tumour suppressor NORE1A and Ras switch II. *The EMBO journal*. 2008;27:1995-2005.
- [7] Bunney TD, Harris R, Gandarillas NL, Josephs MB, Roe SM, Sorli SC, et al. Structural and mechanistic insights into Ras association domains of phospholipase C epsilon. *Molecular cell*. 2006;21:495-507.
- [8] Vetter IR, Linnemann T, Wohlgemuth S, Geyer M, Kalbitzer HR, Herrmann C, et al. Structural and biochemical analysis of Ras-effector signaling via RalGDS. *FEBS letters*. 1999;451:175-80.
- [9] Kiel C, Selzer T, Shaul Y, Schreiber G, Herrmann C. Electrostatically optimized Ras-binding Ral guanine dissociation stimulator mutants increase the rate of association by stabilizing the encounter complex. *Proceedings of the National Academy of Sciences*. 2004;101:9223-8.
- [10] Kiel C, Wohlgemuth S, Rousseau F, Schymkowitz J, Ferkinghoff-Borg J, Wittinghofer F, et al. Recognizing and defining true Ras binding domains II: in silico prediction based on homology modelling and energy calculations. *Journal of molecular biology*. 2005;348:759-75.

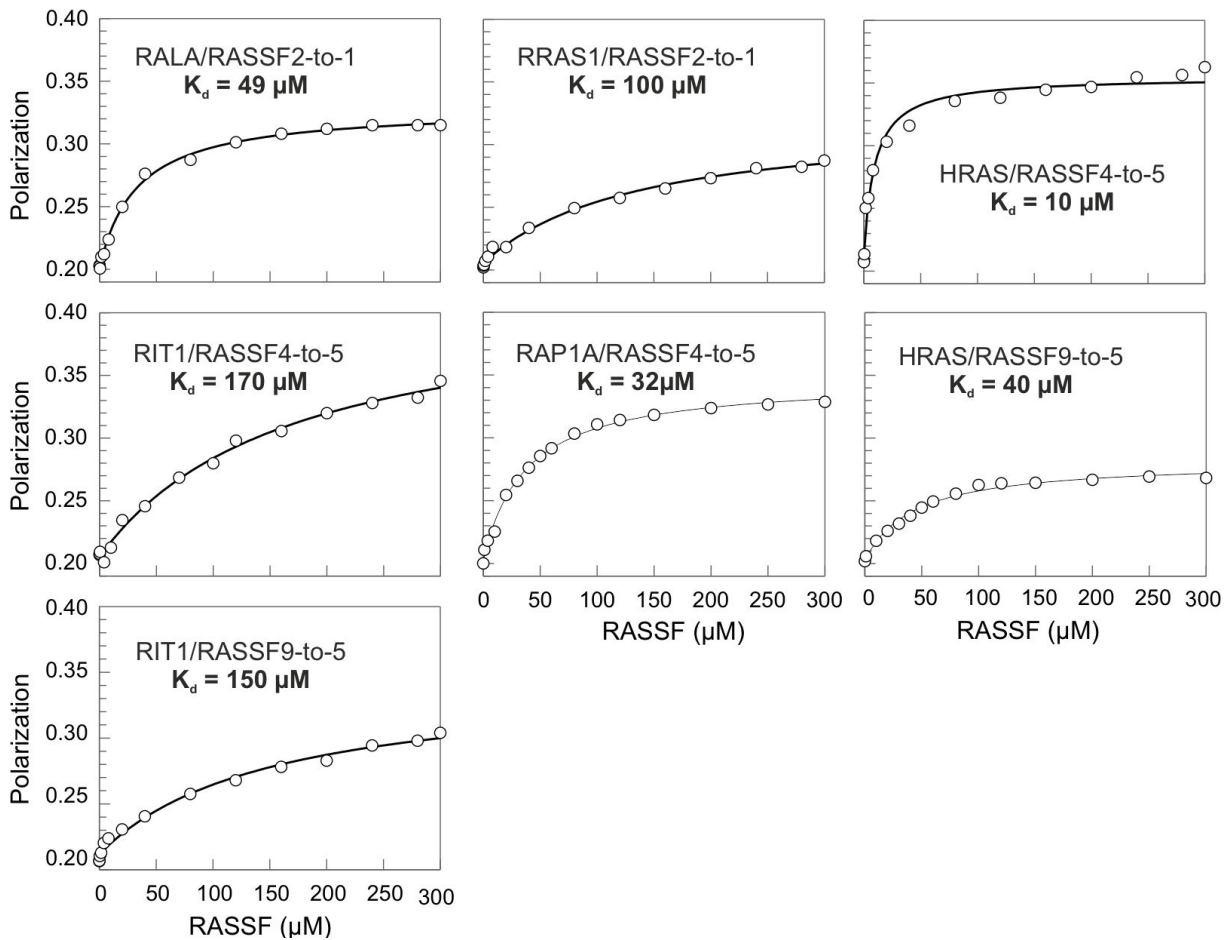

**Figure S10. Fluorescence polarization measurements of the interaction of RASSF hotspot variants with various RAS family proteins.** Fluorescence polarization experiments were conducted to determine the dissociation constants ( $K_d$ ) by titrating the active, mGppNHp-bound form of RAS proteins (1  $\mu$ M) with increasing concentrations of the RA domains of RASSF hotspot variants (RASSF2-to-1 A186K/Y187D/V190K/T191H, RASSF4-to-5: Y185D/S187I/V188K/ N188L and RASSF9-to-5: V40D/G42I/L43K/K45L/R46H; see [Figure 3](#), boxed residues). The X-axis represents the concentration of the effector domain as MBP fusion proteins in  $\mu$ M and Y-axis represents fluorescence polarization. The lines through the data points indicate that equilibrium  $K_d$  values have been determined for the respective measurements. The  $K_d$  values are also summarized in [Figure 4](#).

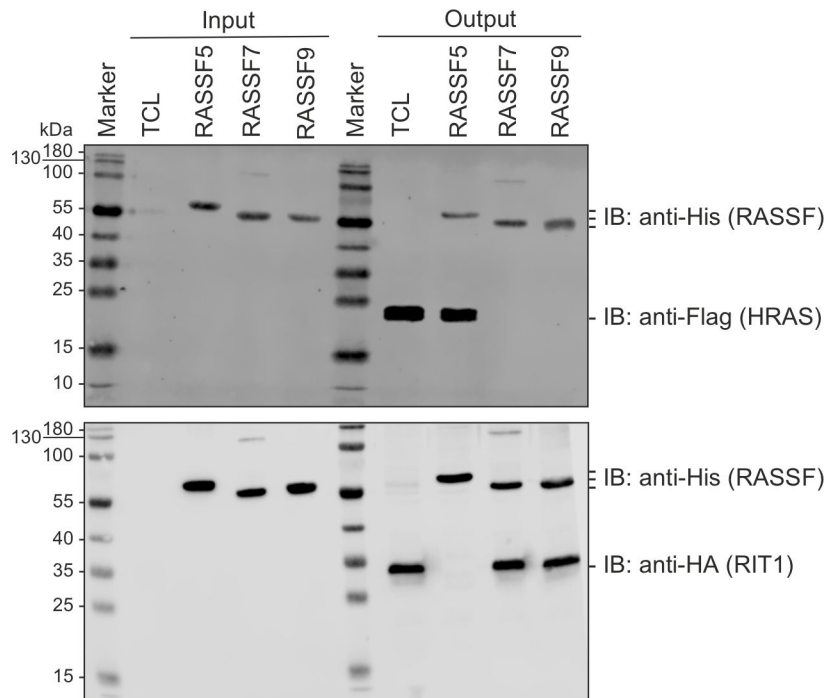

**Figure S11. His-tag pull-down assay of RIT1 and HRAS binding by RASSF1-RA, RASSF7-RA and RASSF9-RA.** HA-RIT1 and FLAG-HRAS, overexpressed in HEK 293T cells, were pulled down using His-tagged MBP-RA domains of RASSF5 (63 kDa), RASSF7 (54 kDa) and RASSF9 (55 kDa). Therefore, His-tagged RASSF-RA proteins (20  $\mu$ g per protein and experiment) were first coupled to the Ni-NTA beads (100  $\mu$ l per experiment) before mixing them with the cell lysates (200  $\mu$ g per experiment). Note that His-pulldown assay did not work when cell lysate and the His-tagged proteins were added to the bead at the same time. Immunoblots of total cell lysates (TCL), evaluated using an Odyssey Fc Imaging System (LI-CORE Biosciences), were served as loading control to detect HA-RIT1 and FLAG-HRAS, respectively, analyzed by immunoblotting (IB) using anti-HA (SC-805, Santa Cruz) and anti-FLAG (F7425, Sigma) antibodies. Input samples represent the quantity of the RASSF proteins prior to being added to the beads and output samples indicate the quantity of the bound RASSF proteins to the beads after pull down. An anti-His (RM146, Thermo Fisher) antibody was used for detection of His-tagged RASSF5, RASSF7 and RASSF9 in input and output as loading control. Input and output samples showed that the RASSF proteins are comparably bound to the beads.
